# Supplementary material
Source: ML conference proceedings conference paper supplement (https://openreview.net/forum?id=3fFZNlSO7GC)
Supplement: supplementary_material [file attachment]

Smartphone usage and awareness

Are you married, or in a common-law, or partner relationship?

- ☐ Yes (1)
- ☐ No (2)

Skip To: End of Survey If Are you married, or in a common-law, or partner relationship? = No

Do you and your partner currently live in the same household?

- ☐ Yes (37)
- ☐ No (38)

Skip To: End of Survey If Do you and your partner currently live in the same household? = No

Do you own a smartphone?

- ☐ Yes (1)
- ☐ No (2)

Skip To: End of Survey If Do you own a smartphone? = No

Does your partner own a smartphone?

- ☐ Yes (23)
- ☐ No (24)

Skip To: End of Survey If Does your partner own a smartphone? = No

End of Block: Eligibility

Start of Block: Demographic Information

Demographic Information (Page 1 of 5)

Which category below includes your age?

▼ Younger than 18 (1) ... 65 or older (12)

Which category below includes your partner's age?

▼ Younger than 18 (1) ... 65 or older (12)

To which gender identity do you most identify?

- ☐ Female (1)
- ☐ Male (4)
- ☐ Transgender Female (2)
- ☐ Transgender Male (5)
- ☐ Gender Variant/Non-Conforming (3)
- ☐ Not Listed (6) \_\_\_\_\_
- ☐ Prefer Not to Answer (7)

In what country were you born?

▼ Afghanistan (1) ... Zimbabwe (1357)

In what country do you live?

▼ Afghanistan (1) ... Zimbabwe (1357)

For how many years have you been living in the country you live in now?

▼ 0 (1) ... 65 (65)

What is the highest degree or level of school you have completed? If you are currently enrolled, please indicate your highest degree received so far.

- ☐ High School Graduate (1)
- ☐ Bachelor's Degree (2)
- ☐ Master's Degree (3)
- ☐ PhD Degree (4)
- ☐ Other (5) \_\_\_\_\_

Including you and your partner, how many adults and children live in your household?

Baby and Toddler: Age Below 3 : \_\_\_\_\_ (1)  
Age Between 3 and 5 : \_\_\_\_\_ (25)  
Age Between 6 and 10 : \_\_\_\_\_ (26)  
Age Between 11 and 18 : \_\_\_\_\_ (27)  
Age Between 19 and 24 : \_\_\_\_\_ (29)  
Age Between 25 and 34 : \_\_\_\_\_ (24)  
Age Between 35 and 44 : \_\_\_\_\_ (12)  
Age Between 45 and 54 : \_\_\_\_\_ (14)  
Age Between 55 and 64 : \_\_\_\_\_ (18)  
Age 65 and above : \_\_\_\_\_ (19)  
Total : \_\_\_\_\_

How many people in your house work full-time or part-time?

▼ 0 (1) ... 10 (11)

Please indicate your current household income in U.S. dollars

▼ Under \$10,000 (4) ... Prefer Not to Answer (12)

What is your occupation?

\_\_\_\_\_

Which of the following does best describe your employment status?

- ☐ Employed, working 1-39 hours per week (1)
- ☐ Employed, working 40 or more hours per week (4)
- ☐ Not employed, looking for work (5)
- ☐ Not employed, NOT looking for work (6)
- ☐ Retired (7)
- ☐ Disabled, not able to work (8)
- ☐ Other (9) \_\_\_\_\_

What is your partner's occupation?

\_\_\_\_\_

Which of the following categories best describes your partner's employment status?

- ☐ Employed, working 1-39 hours per week (1)
- ☐ Employed, working 40 or more hours per week (4)
- ☐ Not employed, looking for work (5)
- ☐ Not employed, NOT looking for work (6)
- ☐ Student (10)
- ☐ Retired (7)
- ☐ Disabled, not able to work (8)
- ☐ Other (9) \_\_\_\_\_

Which of the following does best describe the area you live in?

- ☐ Urban (1)
- ☐ Suburban (4)
- ☐ Rural (5)
- ☐ Other (6) \_\_\_\_\_

For how many years have you and your partner been in a relationship?

In total, for an average day, how many hours do you co-locate with your partner (that means you and your partner are together at any place such as at home - **excluding sleeping time**, shopping mall, restaurant, park, or sidewalk)?

In total, for an average day, how many hours do you spend in collaborative activities (for example, cooking) with your partner?

End of Block: Demographic Information

Start of Block: Smartphones Usage, Rules and Privacy

Smartphone Usage and House Rules (Page 2 of 5)

Including you and your partner, how many adults and how many children in your household have their own smartphone?

- Age Between 3 and 5 : (25)
- Age Between 6 and 10 : (26)
- Age Between 11 and 18 : (27)
- Age Between 19 and 24 : (29)
- Age Between 25 and 34 : (24)
- Age Between 35 and 44 : (12)
- Age Between 45 and 54 : (14)
- Age Between 55 and 64 : (18)
- Age 65 and above : (19)
- Total :

For how many years have you owned a smartphone?

For how many years have your partner owned a smartphone?

In total, for an average day, how many hours do you spend on your smartphone?

On average, how often do you use your smartphone for each of the following purposes?

|                                                                                | Never (6)             | A couple times a month or less (5) | Once a week (4)       | A few times a week (3) | About once a day (2)  | More than once a day (1) |
|--------------------------------------------------------------------------------|-----------------------|------------------------------------|-----------------------|------------------------|-----------------------|--------------------------|
| Communication (such as email, text messages, phone calls, Skype) (1)           | <input type="radio"/> | <input type="radio"/>              | <input type="radio"/> | <input type="radio"/>  | <input type="radio"/> | <input type="radio"/>    |
| Social media (such as Facebook, Instagram, Snapchat) (2)                       | <input type="radio"/> | <input type="radio"/>              | <input type="radio"/> | <input type="radio"/>  | <input type="radio"/> | <input type="radio"/>    |
| Games, Music, and Entertainment (such as Netflix, Spotify, Youtube) (3)        | <input type="radio"/> | <input type="radio"/>              | <input type="radio"/> | <input type="radio"/>  | <input type="radio"/> | <input type="radio"/>    |
| Internet browsing (e.g., news, hobbies, travel, food, banking) (4)             | <input type="radio"/> | <input type="radio"/>              | <input type="radio"/> | <input type="radio"/>  | <input type="radio"/> | <input type="radio"/>    |
| Health (such as apps for fitness tracking, sport, medicine) (9)                | <input type="radio"/> | <input type="radio"/>              | <input type="radio"/> | <input type="radio"/>  | <input type="radio"/> | <input type="radio"/>    |
| Photos and videos (e.g., viewing, capturing, sharing) (10)                     | <input type="radio"/> | <input type="radio"/>              | <input type="radio"/> | <input type="radio"/>  | <input type="radio"/> | <input type="radio"/>    |
| Utility and productivity (e.g., calculator, weather, reminders, calendar) (12) | <input type="radio"/> | <input type="radio"/>              | <input type="radio"/> | <input type="radio"/>  | <input type="radio"/> | <input type="radio"/>    |
| Location sharing (such as Glympse, Life360, Find My Friends) (13)              | <input type="radio"/> | <input type="radio"/>              | <input type="radio"/> | <input type="radio"/>  | <input type="radio"/> | <input type="radio"/>    |
| Maps, navigation and wayfinding (14)                                           | <input type="radio"/> | <input type="radio"/>              | <input type="radio"/> | <input type="radio"/>  | <input type="radio"/> | <input type="radio"/>    |

---

Please estimate how often it happens that your partner concerned about you using your smartphone in the presence of your partner.

- ☐ A couple times a month or less (4)
- ☐ Once a week (5)
- ☐ A few times a week (6)
- ☐ About once a day (7)
- ☐ More than once a day (8)

---

Please estimate how often it happens that you are concerned about your partner using his/her smartphone in your presence.

- ☐ A couple times a month or less (4)
- ☐ Once a week (5)
- ☐ A few times a week (6)
- ☐ About once a day (7)
- ☐ More than once a day (8)

---

Please describe the three most recent situations, where your was partner concerned about you using your smartphone in the presence of your partner.

Your answer might include locations (for example, restaurant) where it happend, what were your partner doing, what triggered him/her to make such a complain

---

---

---

---

---

Do you and your partner have any mutual agreement regarding when NOT to use your smartphones?

☐

Yes (1)

☐

No (2)

*Display This Question:*  
*If Do you and your partner have any mutual agreement regarding when NOT to use your smartphones? = Yes*

Please describe the situations in which you and your partner have agreed that you should not use your smartphones?

*Display This Question:*  
*If Do you and your partner have any mutual agreement regarding when NOT to use your smartphones? = No*

Please describe how you feel about agreeing with your partner on rules regarding when and when not to use your smartphones?

Please describe the situations when you are concerned about smartphone usage but you and your partner have not agreed on them?

Please describe the house rules, if any, regarding the smartphone usage for the other adults (i.e., excluding you and your partner) in your household.

Please describe the house rules, if any, regarding the smartphone usage for children (i.e., age below 18) in your household.

Please describe if you are aware of or use any apps, tools or strategies to reduce your smartphone usage.

How important do you feel having such tools/strategies to reduce your smartphone usage are?

- ☐ Extremely important (13)

☐ Very important (14)

☐ Moderately important (15)

☐ Slightly important (16)

☐ Not at all important (17)

End of Block: Smartphones Usage, Rules and Privacy

Start of Block: Privacy and Trust

How comfortable would you feel having your smartphone speaker turned on in front of each of the following persons? E.g., other people could hear notification sounds, sounds from games, media you are watching, etc.

|                    | Extremely comfortable<br>(20) | Somewhat comfortable<br>(21) | Neither comfortable nor uncomfortable<br>(22) | Somewhat uncomfortable<br>(23) | Extremely uncomfortable<br>(24) |
|--------------------|-------------------------------|------------------------------|-----------------------------------------------|--------------------------------|---------------------------------|
| Partner (1)        | <input type="radio"/>         | <input type="radio"/>        | <input type="radio"/>                         | <input type="radio"/>          | <input type="radio"/>           |
| Family members (2) | <input type="radio"/>         | <input type="radio"/>        | <input type="radio"/>                         | <input type="radio"/>          | <input type="radio"/>           |
| Friends (3)        | <input type="radio"/>         | <input type="radio"/>        | <input type="radio"/>                         | <input type="radio"/>          | <input type="radio"/>           |
| Colleagues (4)     | <input type="radio"/>         | <input type="radio"/>        | <input type="radio"/>                         | <input type="radio"/>          | <input type="radio"/>           |
| Strangers (6)      | <input type="radio"/>         | <input type="radio"/>        | <input type="radio"/>                         | <input type="radio"/>          | <input type="radio"/>           |

How comfortable would you feel to cast your smartphone screen on a large display (such as a television) on the request of the following persons:

|                    | Extremely comfortable<br>(20) | Somewhat comfortable<br>(21) | Neither comfortable nor uncomfortable<br>(22) | Somewhat uncomfortable<br>(23) | Extremely uncomfortable<br>(24) |
|--------------------|-------------------------------|------------------------------|-----------------------------------------------|--------------------------------|---------------------------------|
| Partner (1)        | <input type="radio"/>         | <input type="radio"/>        | <input type="radio"/>                         | <input type="radio"/>          | <input type="radio"/>           |
| Family members (2) | <input type="radio"/>         | <input type="radio"/>        | <input type="radio"/>                         | <input type="radio"/>          | <input type="radio"/>           |
| Friends (3)        | <input type="radio"/>         | <input type="radio"/>        | <input type="radio"/>                         | <input type="radio"/>          | <input type="radio"/>           |
| Colleagues (4)     | <input type="radio"/>         | <input type="radio"/>        | <input type="radio"/>                         | <input type="radio"/>          | <input type="radio"/>           |
| Strangers (6)      | <input type="radio"/>         | <input type="radio"/>        | <input type="radio"/>                         | <input type="radio"/>          | <input type="radio"/>           |

How comfortable would you feel to cast your smartphone screen on a large display (such as a television) to show the following application categories to your partner:

|                                                                                | Extremely comfortable (5) | Somewhat comfortable (4) | Neither comfortable nor uncomfortable (3) | Somewhat uncomfortable (2) | Extremely uncomfortable (1) |
|--------------------------------------------------------------------------------|---------------------------|--------------------------|-------------------------------------------|----------------------------|-----------------------------|
| Communication (such as email, text messages, phone calls, Skype) (1)           | <input type="radio"/>     | <input type="radio"/>    | <input type="radio"/>                     | <input type="radio"/>      | <input type="radio"/>       |
| Social media (such as Facebook, Instagram, Snapchat) (2)                       | <input type="radio"/>     | <input type="radio"/>    | <input type="radio"/>                     | <input type="radio"/>      | <input type="radio"/>       |
| Games, Music, and Entertainment (such as Netflix, Spotify, Youtube) (3)        | <input type="radio"/>     | <input type="radio"/>    | <input type="radio"/>                     | <input type="radio"/>      | <input type="radio"/>       |
| Internet browsing (e.g., news, hobbies, travel, food, banking) (4)             | <input type="radio"/>     | <input type="radio"/>    | <input type="radio"/>                     | <input type="radio"/>      | <input type="radio"/>       |
| Health (such as apps for fitness tracking, sport, medicine) (9)                | <input type="radio"/>     | <input type="radio"/>    | <input type="radio"/>                     | <input type="radio"/>      | <input type="radio"/>       |
| Photos and videos (e.g., viewing, capturing, sharing) (10)                     | <input type="radio"/>     | <input type="radio"/>    | <input type="radio"/>                     | <input type="radio"/>      | <input type="radio"/>       |
| Utility and productivity (e.g., calculator, weather, reminders, calendar) (12) | <input type="radio"/>     | <input type="radio"/>    | <input type="radio"/>                     | <input type="radio"/>      | <input type="radio"/>       |
| Location sharing (such as Glympse, Life360, Find My Friends) (13)              | <input type="radio"/>     | <input type="radio"/>    | <input type="radio"/>                     | <input type="radio"/>      | <input type="radio"/>       |
| Maps, navigation and wayfinding (14)                                           | <input type="radio"/>     | <input type="radio"/>    | <input type="radio"/>                     | <input type="radio"/>      | <input type="radio"/>       |

How comfortable would you feel to share your phone's lock-screen pattern, pin or password on the request of the following persons:

|                    | Extremely comfortable<br>(20) | Somewhat comfortable<br>(21) | Neither comfortable nor uncomfortable<br>(22) | Somewhat uncomfortable<br>(23) | Extremely uncomfortable<br>(24) |
|--------------------|-------------------------------|------------------------------|-----------------------------------------------|--------------------------------|---------------------------------|
| Partner (1)        | <input type="radio"/>         | <input type="radio"/>        | <input type="radio"/>                         | <input type="radio"/>          | <input type="radio"/>           |
| Family members (2) | <input type="radio"/>         | <input type="radio"/>        | <input type="radio"/>                         | <input type="radio"/>          | <input type="radio"/>           |
| Friends (3)        | <input type="radio"/>         | <input type="radio"/>        | <input type="radio"/>                         | <input type="radio"/>          | <input type="radio"/>           |
| Colleagues (4)     | <input type="radio"/>         | <input type="radio"/>        | <input type="radio"/>                         | <input type="radio"/>          | <input type="radio"/>           |
| Strangers (6)      | <input type="radio"/>         | <input type="radio"/>        | <input type="radio"/>                         | <input type="radio"/>          | <input type="radio"/>           |

-----

When your partner asks about what you are doing on your smartphone, please indicate how truthful are you in sharing the information.

|                                                                                                  | Very Truthful<br>(5)  | Moderately<br>Truthful (4) | Somewhat<br>Truthful (3) | Only Slightly<br>Truthful (2) | Not At All<br>Truthful (1) |
|--------------------------------------------------------------------------------------------------|-----------------------|----------------------------|--------------------------|-------------------------------|----------------------------|
| Communication<br>(such as email,<br>text messages,<br>phone calls,<br>Skype) (1)                 | <input type="radio"/> | <input type="radio"/>      | <input type="radio"/>    | <input type="radio"/>         | <input type="radio"/>      |
| Social media<br>(such as<br>Facebook,<br>Instagram,<br>Snapchat) (2)                             | <input type="radio"/> | <input type="radio"/>      | <input type="radio"/>    | <input type="radio"/>         | <input type="radio"/>      |
| Games, Music,<br>and<br>Entertainment<br>(such as<br>Netflix, Spotify,<br>Youtube) (3)           | <input type="radio"/> | <input type="radio"/>      | <input type="radio"/>    | <input type="radio"/>         | <input type="radio"/>      |
| Internet<br>browsing (e.g.,<br>news, hobbies,<br>travel, food,<br>banking) (4)                   | <input type="radio"/> | <input type="radio"/>      | <input type="radio"/>    | <input type="radio"/>         | <input type="radio"/>      |
| Health (such as<br>apps for fitness<br>tracking, sport,<br>medicine) (9)                         | <input type="radio"/> | <input type="radio"/>      | <input type="radio"/>    | <input type="radio"/>         | <input type="radio"/>      |
| Photos and<br>videos (e.g.,<br>viewing,<br>capturing,<br>sharing) (10)                           | <input type="radio"/> | <input type="radio"/>      | <input type="radio"/>    | <input type="radio"/>         | <input type="radio"/>      |
| Utility and<br>productivity<br>(e.g.,<br>calculator,<br>weather,<br>reminders,<br>calendar) (12) | <input type="radio"/> | <input type="radio"/>      | <input type="radio"/>    | <input type="radio"/>         | <input type="radio"/>      |
| Location<br>sharing (such<br>as Glympse,<br>Life360, Find<br>My Friends)<br>(13)                 | <input type="radio"/> | <input type="radio"/>      | <input type="radio"/>    | <input type="radio"/>         | <input type="radio"/>      |
| Maps,<br>navigation and<br>wayfinding (14)                                                       | <input type="radio"/> | <input type="radio"/>      | <input type="radio"/>    | <input type="radio"/>         | <input type="radio"/>      |

Please write down the three most important reasons about why do you share truthful information/not share truthful information as answered in the previous question.

---

---

---

When you ask your partner about his/her smartphone usage activity, please indicate how confident you are that your partner is telling true information.

- ☐ Not at all confident (1)
- ☐ Only slightly confident (8)
- ☐ Somewhat confident (9)
- ☐ Moderately confident (10)
- ☐ Very confident (11)

Please, write down the reasons about your choice that you indicated in response to the previous question.

---

---

---

---

---

Write a few concerns, if any, that you might have when sharing content with your partner (for example, "my partner might share information to other people which I want to keep confidential").

---

---

---

---

---

End of Block: Privacy and Trust

Start of Block: Co-Located Smartphone Usage

-----

In total, for an average day, how many hours do you spend on your smartphone while you are co-located with your partner?

---

-----

Please, write down at least the three most important reasons for you using your smartphone when you are co-located with your partner (for example, checking official emails that are important to me).

---

---

---

---

---

-----

Please, mention at least the three most recent places, with scenarios, where you and your partner were co-located and both you and your partner were using your

---

---

---

---

---

-----

Please, briefly describe at least three scenarios when your partner asked you to stop using or turn off your smartphone to join family activities or conversations.

---

---

---

---

---

Please estimate how often it happens that you use your smartphone for each of the following purposes while you are co-located with your partner.

|                                                                                | Never (6)             | A couple times a month or less (5) | Once a week (4)       | A few times a week (3) | About once a day (2)  | More than once a day (1) |
|--------------------------------------------------------------------------------|-----------------------|------------------------------------|-----------------------|------------------------|-----------------------|--------------------------|
| Communication (such as email, text messages, phone calls, Skype) (1)           | <input type="radio"/> | <input type="radio"/>              | <input type="radio"/> | <input type="radio"/>  | <input type="radio"/> | <input type="radio"/>    |
| Social media (such as Facebook, Instagram, Snapchat) (2)                       | <input type="radio"/> | <input type="radio"/>              | <input type="radio"/> | <input type="radio"/>  | <input type="radio"/> | <input type="radio"/>    |
| Games, Music, and Entertainment (such as Netflix, Spotify, Youtube) (3)        | <input type="radio"/> | <input type="radio"/>              | <input type="radio"/> | <input type="radio"/>  | <input type="radio"/> | <input type="radio"/>    |
| Internet browsing (e.g., news, hobbies, travel, food, banking) (4)             | <input type="radio"/> | <input type="radio"/>              | <input type="radio"/> | <input type="radio"/>  | <input type="radio"/> | <input type="radio"/>    |
| Health (such as apps for fitness tracking, sport, medicine) (9)                | <input type="radio"/> | <input type="radio"/>              | <input type="radio"/> | <input type="radio"/>  | <input type="radio"/> | <input type="radio"/>    |
| Photos and videos (e.g., viewing, capturing, sharing) (10)                     | <input type="radio"/> | <input type="radio"/>              | <input type="radio"/> | <input type="radio"/>  | <input type="radio"/> | <input type="radio"/>    |
| Utility and productivity (e.g., calculator, weather, reminders, calendar) (12) | <input type="radio"/> | <input type="radio"/>              | <input type="radio"/> | <input type="radio"/>  | <input type="radio"/> | <input type="radio"/>    |
| Location sharing (such as Glympse, Life360, Find My Friends) (13)              | <input type="radio"/> | <input type="radio"/>              | <input type="radio"/> | <input type="radio"/>  | <input type="radio"/> | <input type="radio"/>    |
| Maps, navigation and wayfinding (14)                                           | <input type="radio"/> | <input type="radio"/>              | <input type="radio"/> | <input type="radio"/>  | <input type="radio"/> | <input type="radio"/>    |

End of Block: Co-Located Smartphone Usage

Start of Block: Smartphone Usage Awareness and Content Sharing

In situations when you are co-located with your partner, how aware are you about exactly what your partner is doing on his/her smartphone?

In most cases, I am \_\_\_\_\_ of what my partner is doing.

- ☐ Extremely aware (5)
  - ☐ Very aware (6)
  - ☐ Moderately aware (7)
  - ☐ Little aware (8)
  - ☐ Not at all aware (9)
- 

Normally, in situations where you are co-located with your partner and your partner is using his/her smartphone, how interested are you in knowing what he/she does on his/her smartphone?

In most cases, I am \_\_\_\_\_ in knowing what my partner is doing.

- ☐ Extremely interested (5)
  - ☐ Very interested (6)
  - ☐ Moderately interested (7)
  - ☐ Little interested (8)
  - ☐ Not at all interested (9)
-

When you are co-located with your partner, how frequently do you share information about your smartphone activities with your partner?

- ☐ Never (10)
- ☐ A couple times a month or less (4)
- ☐ Once a week (5)
- ☐ A few times a week (6)
- ☐ About once a day (7)
- ☐ More than once a day (8)

When you and your partner are co-located and your partner is using his/her smartphone and you ask your partner about what he/she is doing on the smartphone, how does your partner inform you about it? Please briefly describe.

In co-located situations, when you ask your partner what he/she is doing on his/her smartphone, what kind of information does your partner share with you? For each of the following usage purposes, please indicate the level of detail your partner shares with you.

|                                                                                | This never happens (5) | I typically get no information at all (4) | I typically get to know my partner's activity such as "playing games" (3) | I typically get to know what app my partner uses such as "using Facebook" (2) | I typically get to know detailed information about the app and the activity such as "chatting with Alex in Facebook" (1) |
|--------------------------------------------------------------------------------|------------------------|-------------------------------------------|---------------------------------------------------------------------------|-------------------------------------------------------------------------------|--------------------------------------------------------------------------------------------------------------------------|
| Communication (such as email, text messages, phone calls, Skype) (1)           | <input type="radio"/>  | <input type="radio"/>                     | <input type="radio"/>                                                     | <input type="radio"/>                                                         | <input type="radio"/>                                                                                                    |
| Social media (such as Facebook, Instagram, Snapchat) (2)                       | <input type="radio"/>  | <input type="radio"/>                     | <input type="radio"/>                                                     | <input type="radio"/>                                                         | <input type="radio"/>                                                                                                    |
| Games, Music, and Entertainment (such as Netflix, Spotify, Youtube) (3)        | <input type="radio"/>  | <input type="radio"/>                     | <input type="radio"/>                                                     | <input type="radio"/>                                                         | <input type="radio"/>                                                                                                    |
| Internet browsing (e.g., news, hobbies, travel, food, banking) (4)             | <input type="radio"/>  | <input type="radio"/>                     | <input type="radio"/>                                                     | <input type="radio"/>                                                         | <input type="radio"/>                                                                                                    |
| Health (such as apps for fitness tracking, sport, medicine) (9)                | <input type="radio"/>  | <input type="radio"/>                     | <input type="radio"/>                                                     | <input type="radio"/>                                                         | <input type="radio"/>                                                                                                    |
| Photos and videos (e.g., viewing, capturing, sharing) (10)                     | <input type="radio"/>  | <input type="radio"/>                     | <input type="radio"/>                                                     | <input type="radio"/>                                                         | <input type="radio"/>                                                                                                    |
| Utility and productivity (e.g., calculator, weather, reminders, calendar) (12) | <input type="radio"/>  | <input type="radio"/>                     | <input type="radio"/>                                                     | <input type="radio"/>                                                         | <input type="radio"/>                                                                                                    |
| Location sharing (such as Glympse, Life360, Find My Friends) (13)              | <input type="radio"/>  | <input type="radio"/>                     | <input type="radio"/>                                                     | <input type="radio"/>                                                         | <input type="radio"/>                                                                                                    |
| Maps, navigation and wayfinding (14)                                           | <input type="radio"/>  | <input type="radio"/>                     | <input type="radio"/>                                                     | <input type="radio"/>                                                         | <input type="radio"/>                                                                                                    |

-----

Normally, in situations where you are co-located with your partner and you are using your smartphone, how interested is your partner in knowing what you are doing on your smartphone?

In most cases, my partner is \_\_\_\_\_ in knowing what I am doing.

- ☐ Extremely interested (1)
  - ☐ Very interested (6)
  - ☐ Moderately interested (7)
  - ☐ Little interested (8)
  - ☐ Not at all interested (9)
- 

When you and your partner are co-located and you are using your smartphone and your partner asks you about what you are doing on your smartphone, how do you inform your partner about what you are doing? Please briefly describe.

\_\_\_\_\_

\_\_\_\_\_

\_\_\_\_\_

\_\_\_\_\_

\_\_\_\_\_

-----

In co-located situations, when your partner asks you what you are doing on your smartphone, what kind of information do you typically share with your partner? For each of the following usage purposes, please indicate the level of detail you typically share with your partner.

|                                                                                | This never happens (5) | I typically give my partner no information at all (4) | I typically provide information about my activity such as "playing games" (3) | I typically provide information about which App I am using such as "using Facebook" (2) | I typically provide detailed information about the app and the activity such as "chatting with Alex in Facebook" (1) |
|--------------------------------------------------------------------------------|------------------------|-------------------------------------------------------|-------------------------------------------------------------------------------|-----------------------------------------------------------------------------------------|----------------------------------------------------------------------------------------------------------------------|
| Communication (such as email, text messages, phone calls, Skype) (1)           | <input type="radio"/>  | <input type="radio"/>                                 | <input type="radio"/>                                                         | <input type="radio"/>                                                                   | <input type="radio"/>                                                                                                |
| Social media (such as Facebook, Instagram, Snapchat) (2)                       | <input type="radio"/>  | <input type="radio"/>                                 | <input type="radio"/>                                                         | <input type="radio"/>                                                                   | <input type="radio"/>                                                                                                |
| Games, Music, and Entertainment (such as Netflix, Spotify, Youtube) (3)        | <input type="radio"/>  | <input type="radio"/>                                 | <input type="radio"/>                                                         | <input type="radio"/>                                                                   | <input type="radio"/>                                                                                                |
| Internet browsing (e.g., news, hobbies, travel, food, banking) (4)             | <input type="radio"/>  | <input type="radio"/>                                 | <input type="radio"/>                                                         | <input type="radio"/>                                                                   | <input type="radio"/>                                                                                                |
| Health (such as apps for fitness tracking, sport, medicine) (9)                | <input type="radio"/>  | <input type="radio"/>                                 | <input type="radio"/>                                                         | <input type="radio"/>                                                                   | <input type="radio"/>                                                                                                |
| Photos and videos (e.g., viewing, capturing, sharing) (10)                     | <input type="radio"/>  | <input type="radio"/>                                 | <input type="radio"/>                                                         | <input type="radio"/>                                                                   | <input type="radio"/>                                                                                                |
| Utility and productivity (e.g., calculator, weather, reminders, calendar) (12) | <input type="radio"/>  | <input type="radio"/>                                 | <input type="radio"/>                                                         | <input type="radio"/>                                                                   | <input type="radio"/>                                                                                                |
| Location sharing (such as Glympse, Life360, Find My Friends) (13)              | <input type="radio"/>  | <input type="radio"/>                                 | <input type="radio"/>                                                         | <input type="radio"/>                                                                   | <input type="radio"/>                                                                                                |
| Maps, navigation and wayfinding (14)                                           | <input type="radio"/>  | <input type="radio"/>                                 | <input type="radio"/>                                                         | <input type="radio"/>                                                                   | <input type="radio"/>                                                                                                |

---

Please, select what information would you like to get when you ask your partner to share his/her smartphone usage activity?

- ☐ Details (for example, detailed information such as "chatting with Alex in Facebook") (1)
- ☐ App name (for example, the app he/she uses such as "using Facebook") (4)
- ☐ Activity name (for example, the activity he/she is involved in such as "playing games") (5)
- ☐ Others (6) \_\_\_\_\_

---

Please, select what information would you like to provide when your partner asks you to share your smartphone activity?

- ☐ Details (for example, detailed information such as "chatting with Alex in Facebook") (1)
- ☐ App name (for example, the app name such as "using Facebook") (4)
- ☐ Activity name (for example, my activity such as "playing games") (5)
- ☐ Others (6) \_\_\_\_\_

---

Write a few examples, if any, where you share different level of app detail with different people (such as family members, friends, colleagues)

End of Block: Smartphone Usage Awareness and Content Sharing

---
